# Supplementary material
Source: MDPI journal article supplement (https://www.mdpi.com/2073-4441/14/4/617)
Supplement: s1 [file s1 › water-1563711-SI.pdf]

## FRAMES Overview

The Framework for Aquatic Modeling in the Earth System (FrAMES) was designed for coupled simulations of hydrology and biogeochemistry. FrAMES uses the Water Transport Model for flow propagation through the Simulated Topological Network (STN). We used the STN representing the river network of the study domain of a geographic resolution of 45 arc seconds (approximately 1.5 km resolution). Daily gridded precipitation and air temperature data were acquired from NASA's Global Modeling and Assimilation Office (Modern Era- Retrospective Analysis for Research and Applications, or MERRA).

The cross-sectional channel shape of a stream is governed by at-a-site and downstream hydraulic geometry [1]. Hydraulic geometry that influence residence time and exchange with sediments, and hence removal, were estimated based on empirical functions of width, depth and velocity vs. discharge. Simulated discharge to calculate river channel dimensions with downstream and at-a-site power law relationships [2]. Hydraulic dimensions change with discharge both at-a-site, and in the downstream direction [3]. In the downstream direction, mean annual channel width ( $W_a, m$ ), depth ( $D_a, m$ ), and velocity ( $V_a, m\ s^{-1}$ ) in river stream reach  $i$  were calculated from the relationship with mean annual discharge ( $Q_a$ ) developed by Stewart et al. (2011) [4]:

|                        |      |
|------------------------|------|
| $W_a = 9.56Q_a^{0.65}$ | (S1) |
|------------------------|------|

|                        |      |
|------------------------|------|
| $D_a = 0.45Q_a^{0.17}$ | (S2) |
|------------------------|------|

|                        |      |
|------------------------|------|
| $V_a = 0.23Q_a^{0.18}$ | (S3) |
|------------------------|------|

Instantaneous channel width, depth, and velocity in stream reach  $i$  ( $w_i$ ,  $d_i$ , and  $v_i$ ) at each time step are based on the at-a-site power relationship with instantaneous discharge ( $q_i$ ,  $\text{m}^3\text{s}^{-1}$ ):

|                   |      |
|-------------------|------|
| $w_i = a_i q_i^x$ | (S4) |
|-------------------|------|

|                   |      |
|-------------------|------|
| $d_i = b_i q_i^y$ | (S5) |
|-------------------|------|

|                   |      |
|-------------------|------|
| $v_i = c_i q_i^z$ | (S6) |
|-------------------|------|

where  $a_i = W_a/Q_a^x$ ,  $b_i = D_a/Q_a^y$ , and  $c_i = V_a/Q_a^z$ . The values for  $x$ ,  $y$ , and  $z$  are 0.1, 0.4, and 0.5 [5], respectively, and are typical for rivers worldwide [1,6].

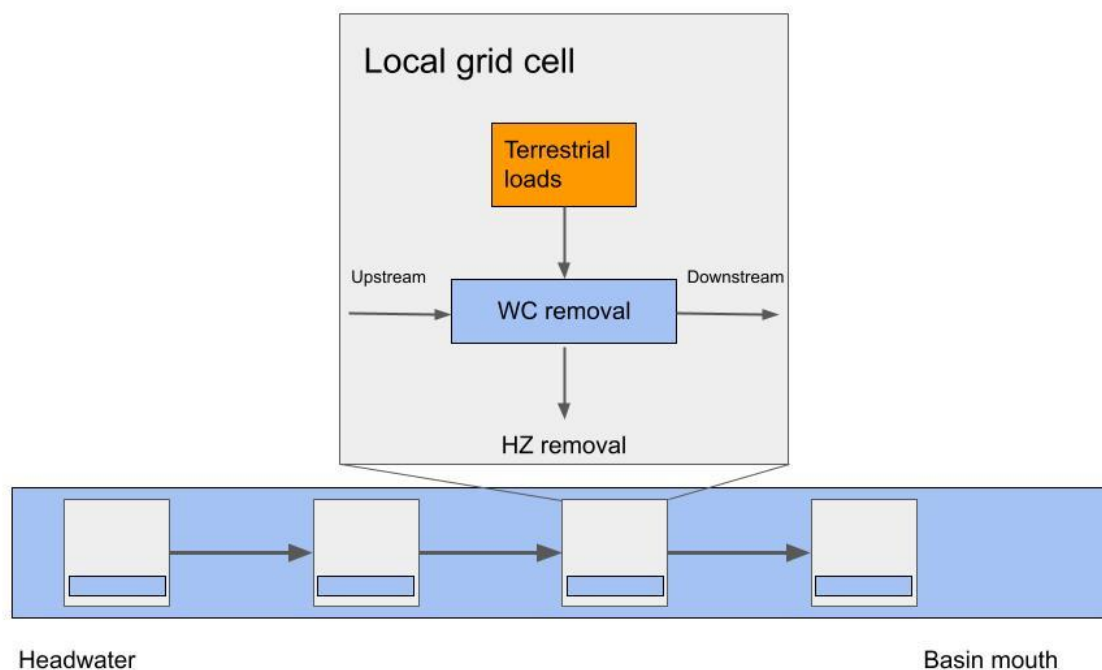

**Figure S1.** The conceptual model of the *E. coli* fate and transport in the FrAMES model.

**Table S1.** Characteristics of study watersheds.

| <b>Watershed</b> | <b>Area<br/>(km<sup>2</sup>)</b> | <b>Developed<br/>(%)</b> | <b>Forest<br/>(%)</b> | <b>Other<br/>(%)</b> | <b>Average summer<br/>daily runoff<sup>a</sup><br/>(mm/d)</b> | <b>Skewness<br/>index</b> |
|------------------|----------------------------------|--------------------------|-----------------------|----------------------|---------------------------------------------------------------|---------------------------|
| Winnicut R.      | 40                               | 28                       | 31                    | 41                   | 0.77                                                          | 1.06                      |
| Oyster R.        | 44                               | 18                       | 55                    | 27                   | 0.71                                                          | 0.77                      |
| Ipswich R.       | 403                              | 36                       | 35                    | 29                   | 0.78                                                          | 1.09                      |
| Coheco R.        | 456                              | 10                       | 65                    | 25                   | 0.93                                                          | 0.72                      |
| Lamprey R.       | 551                              | 14                       | 61                    | 24                   | 0.66                                                          | 0.89                      |
| Merrimack R.     | 11996                            | 13                       | 68                    | 19                   | 1.19                                                          | 0.64                      |
| Penobscot R.     | 22691                            | 2                        | 67                    | 30                   | 1.65                                                          | 0.56                      |

<sup>a</sup>Based on USGS gauges between 2011 and 2015.

**Table S2.** Comparison of *E. coli* loading function.

| Study                    | Independent variables                   | Dependent variable                                                                                               | R <sup>2</sup> |
|--------------------------|-----------------------------------------|------------------------------------------------------------------------------------------------------------------|----------------|
| Strauch et al. 2014 [7]  | % forest cover and mean annual rainfall | Monthly log-transformed <i>E. coli</i> yield ( <i>E. coli</i> *discharge, MPN s <sup>-1</sup> km <sup>-2</sup> ) | 0.62           |
| Islam et al. 2017 [8]    | Water temperature and precipitation     | log transformed monthly mean <i>E. coli</i>                                                                      | 0.46           |
| Chen and Chang, 2014 [9] | Precipitation, TSS, and temperature     | log transformed seasonal mean <i>E. coli</i>                                                                     | 0.27- 0.61     |

**Table S3.** A priori parameter values for the FrAMES-*Ecoli* module.

| Parameter                                                           | Value                | Unit            | Reference                                              |
|---------------------------------------------------------------------|----------------------|-----------------|--------------------------------------------------------|
| Water Column <i>E. coli</i> die-off rate (K <sub>20</sub> )         | 0.8                  | d <sup>-1</sup> | Mancini (1978)<br>[Error! Reference source not found.] |
| Hyporheic exchange coefficient ( $\alpha_{HZ}$ )                    | 9.5*10 <sup>-6</sup> | s <sup>-1</sup> | Briggs et al. (2010)<br>[11]                           |
| Temperature adjustment factor ( $\theta$ )                          | 1.07                 | Dimensionless   | Mancini (1978)<br>[Error! Reference source not found.] |
| The proportional removal of <i>E. coli</i> in HZ (R <sub>HZ</sub> ) | 1                    | Dimensionless   | Assumption of this study.                              |

**Table S4.** Sensitivity analysis of parameter impacts to WC, HZ, and total *E. coli* removal by the Oyster R. network compared to the Base scenario as defined in Table S3 ( $\alpha_{HZ}$ : exchange coefficient, A<sub>cross</sub> (width\*depth): cross-sectional

area,  $\theta$ : temperature adjustment factor,  $R_{HZ}$ : the proportional removal of *E. coli* in the HZ, and  $K_{20}$ : die-off rate at 20 °C).

|                     | WC (%) | HZ (%) | Total (%) |
|---------------------|--------|--------|-----------|
| Base values         | 6      | 20     | 26        |
| $A_{cross} +25\%$   | 6      | 23     | 29        |
| $A_{cross} -25\%$   | 4      | 15     | 19        |
| $\alpha_{HZ} +25\%$ | 4      | 23     | 27        |
| $\alpha_{HZ} -25\%$ | 7      | 16     | 23        |
| $R_{HZ} -25\%$      | 7      | 16     | 23        |
| $K_{20} +25\%$      | 8      | 19     | 27        |
| $K_{20} -25\%$      | 5      | 20     | 25        |
| $\theta=1.12$       | 3      | 21     | 24        |
| $\theta=1.02$       | 16     | 17     | 33        |

**Table S5.** *E. coli* removal parameters included in previous studies.

| Study                        | Scale        | Model(s)                                 | Temperature | Predation | Nutrient | Solar radiation |
|------------------------------|--------------|------------------------------------------|-------------|-----------|----------|-----------------|
| Cho et al. (2012) [12]       | Watershed    | Modified SWAT                            | Yes         | No        | No       | Yes             |
| Drummond et al. (2015) [13]  | Stream reach | A numerical model developed by the study | Yes         | No        | No       | No              |
| Surbeck et al. (2010) [14]   | Microcosm    | Spearman's rank correlation              | Yes         | Yes       | Yes      | No              |
| Iudicello & Chin (2015) [15] | Watershed    | SWAT and HSPF                            | Yes         | No        | No       | No              |
| Niazi et al. (2015) [16]     | Watershed    | SWAT                                     | Yes         | No        | No       | No              |

|                              |                 |               |     |    |    |     |
|------------------------------|-----------------|---------------|-----|----|----|-----|
| Whitehead et al. (2016) [17] | Watershed       | INCA Model    | Yes | No | No | Yes |
| Kim et al. (2017) [18]       | Watershed       | Modified SWAT | Yes | No | No | No  |
| Reder et al. (2015) [19]     | Large watershed | WorldQual     | Yes | No | No | Yes |
| Kondo et al. (2021) [20]     | Watershed       | SWAT          | Yes | No | No | No  |
| Sowah et al. (2020) [21]     | Watershed       | SWAT          | Yes | No | No | No  |

## References

- Deng, Z.-Q.; Singh, V.P.; Bengtsson, L. Longitudinal dispersion coefficient in straight rivers. *Journal of hydraulic engineering* **2001**, *127*, 919–927.
- Knighton, A.D. Downstream variation in stream power. *Geomorphology* **1999**, *29*, 293–306.
- Leopold, L.B.; Maddock, T. *The Hydraulic Geometry of Stream Channels and Some Physiographic Implications*; US Government Printing Office, 1953; Vol. 252.
- Stewart, R.J.; Wollheim, W.M.; Gooseff, M.N.; Briggs, M.A.; Jacobs, J.M.; Peterson, B.J.; Hopkinson, C.S. Separation of river network–scale nitrogen removal among the main channel and two transient storage compartments. *Water Resources Research* **2011**, *47*.
- Zarriello, P.J.; Ries, K.G. *A Precipitation-Runoff Model for Analysis of the Effects of Water Withdrawals on Streamflow, Ipswich River Basin, Massachusetts*; US Department of the Interior, US Geological Survey, 2000.
- Park, C.C. World-wide variations in hydraulic geometry exponents of stream channels: An analysis and some observations. *Journal of Hydrology* **1977**, *33*, 133–146.
- Strauch, A.M.; Mackenzie, R.A.; Bruland, G.L.; Tingley III, R.; Giardina, C.P. Climate change and land use drivers of fecal bacteria in tropical hawaiian rivers. *Journal of environmental quality* **2014**, *43*, 1475–1483.
- Islam, M.M.; Hofstra, N.; Islam, M.A. The impact of environmental variables on faecal indicator bacteria in the Betna river basin, Bangladesh. *Environmental Processes* **2017**, *4*, 319–332.
- Chen, H.; Chang, H. Response of discharge, TSS, and e. Coli to rainfall events in urban, suburban, and rural watersheds. *Environmental Science: Processes & Impacts* **2014**, *16*, 2313–2324.
- Mancini, J.L. Numerical estimates of coliform mortality-rates under various conditions. *J. Water Pollut. Control Fed.* **1978**, *50*, 2477–2484.
- Briggs, M.A.; Gooseff, M.N.; Peterson, B.J.; Morkeski, K.; Wollheim, W.M.; Hopkinson, C.S. Surface and hyporheic transient storage dynamics throughout a coastal stream network. *Water Resources Research* **2010**, *46*.
- Cho, K.H.; Pachepsky, Y.A.; Oliver, D.M.; Muirhead, R.W.; Park, Y.; Quilliam, R.S.; Shelton, D.R. Modeling fate and transport of fecally-derived microorganisms at the watershed scale: State of the science and future opportunities. *Water Research* **2016**, *100*, 38–56.
- Drummond, J.D.; Davies-Colley, R.J.; Stott, R.; Sukias, J.P.; Nagels, J.W.; Sharp, A.; Packman, A.I. Microbial transport, retention, and inactivation in streams: a combined experimental and stochastic modeling approach. *Environmental Science & Technology* **2015** *49*(13), 7825–7833.
- Surbeck, C.Q.; Jiang, S.C.; Grant, S.B. Ecological control of fecal indicator bacteria in an urban stream. *Environmental Science & Technology* **2010**, *44*, 631–637.
- Iudicello, J.J.; Chin, D.A. In-stream bacteria modeling as a function of the hydrologic state of a watershed. *Journal of Environmental Engineering* **2015**, *141*, 04014073.

16. Niazi, M.; Obropta, C.; Miskewitz, R. Pathogen transport and fate modeling in the upper Salem river watershed using SWAT model. *Journal of environmental management* **2015**, *151*, 167–177.
17. Whitehead, P.G.; Leckie, H.; Rankinen, K.; Butterfield, D.; Futter, M.; Bussi, G. An INCA model for pathogens in rivers and catchments: Model structure, sensitivity analysis and application to the river Thames catchment, UK. *Science of the Total Environment* **2016**, *572*, 1601–1610.
18. Kim, M.; Boithias, L.; Cho, K.H.; Silvera, N.; Thammahacksa, C.; Latsachack, K.; Rochelle-Newall, E.; Sengtaheuanghoung, O.; Pierret, A.; Pachepsky, Y.A.; et al. Hydrological modeling of fecal indicator bacteria in a tropical mountain catchment. *Water Research* **2017**, *119*, 102–113.
19. Reder, K.; Flörke, M.; Alcamo, J. Modeling historical fecal coliform loadings to large European rivers and resulting in-stream concentrations. *Environmental Modelling & Software* **2015**, *63*, 251–263.
20. Kondo, T.; Sakai, N.; Yazawa, T.; Shimizu, Y. Verifying the applicability of SWAT to simulate fecal contamination for watershed management of Selangor River, Malaysia. *Science of the Total Environment* **2021**, *774*, 145075.
21. Sowah, R.A.; Bradshaw, K.; Snyder, B.; Spidle, D.; Molina, M. Evaluation of the soil and water assessment tool (SWAT) for simulating *E. coli* concentrations at the watershed-scale. *Science of the Total Environment* **2020**, *746*, 140669.
